# Supplementary material for: Safety of outpatient vs. inpatient anterior cervical discectomy and fusion: a systematic review and meta-analysis
Source: PeerJ. 2025 Sep 22;13:e20045. doi: 10.7717/peerj.20045 (PMC12462687; doi:10.7717/peerj.20045)
Supplement: Supplemental Information 23 [file peerj-13-20045-s023.xlsx]

## Sheet: Continous data
Study	Sample-I	Mean-I	SD-I	Sample-C	Mean-C	SD-C	Outcome
Tani S et al (2023)	494	25	24.8	168	50	57.5	EBL (ml)
Lee R et al (2020)	2610	1.1	2.2	7774	2.5	6.8	Hospital stay (hrs)
Vaishnav A et al_1 (2019)	57	33	13.6	46	45.9	27.4	EBL (ml)
Vaishnav A et al_1 (2019)	57	8.5	4.4	46	35.8	15.4	Hospital stay (hrs)
Patel DV et al (2019)	100	5.9	1.1	172	23.4	15.4	Hospital stay (hrs)
Patel DV et al (2019)	100	28.2	9.3	172	37.4	18.6	EBL (ml)
Vaishnav A et al _2 (2019)	25	30.2	12.7	58	40.1	25.2	EBL (ml)
Vaishnav A et al _2 (2019)	25	6.2	0.6	58	25.4	19.1	Hospital stay (hrs)
Purger DA et al (2019)	370	6.5	12.5	1789	40.8	45.6	Hospital stay (hrs)
Purger DA et al (2018)	3135	8.64	12.5	46996	42.7	52.3	Hospital stay (hrs)

## Sheet: Categorical data
	Study	Effect size	lower CI	Upper CI	Outcome
1	Tani S et al (2023)	0.68	0.13	3.68	Any complication
2	Boddapati V et al (2021)	0.56	0.34	0.9	Any complication
3	Boddapati V et al (2021)	0.31	0.04	2.41	Mortality
4	Boddapati V et al (2021)	0.34	0.02	6.17	Renal complications
5	Boddapati V et al (2021)	0.25	0.06	1.05	Pulmonary complications
6	Boddapati V et al (2021)	0.75	0.17	3.42	DVT
7	Boddapati V et al (2021)	0.63	0.08	5.2	Stroke/CVA
8	Boddapati V et al (2021)	0.19	0.06	0.59	Unplanned reoperation
9	Boddapati V et al (2021)	0.34	0.04	2.64	Sepsis
10	Boddapati V et al (2021)	0.38	0.05	2.93	Wound infection/dehiscence
11	Boddapati V et al (2021)	0.18	0.03	1.33	UTI
12	Boddapati V et al (2021)	0.21	0.03	1.56	Need for BT
13	Boddapati V et al (2021)	0.75	0.47	1.2	Readmission
14	Kamalapathy PN et al (2021)	0.58	0.54	0.63	Any complication
15	Kamalapathy PN et al (2021)	0.75	0.67	0.84	Dysphagia
16	Kamalapathy PN et al (2021)	0.6	0.52	0.69	Wound infection/dehiscence
17	Kamalapathy PN et al (2021)	0.63	0.55	0.72	UTI
18	Kamalapathy PN et al (2021)	0.42	0.32	0.54	DVT
19	Kamalapathy PN et al (2021)	0.43	0.29	0.63	Need for BT
20	Kamalapathy PN et al (2021)	0.55	0.42	0.72	Renal complications
21	Kamalapathy PN et al (2021)	0.91	0.62	1.33	Cardiac complications
22	Kamalapathy PN et al (2021)	0.55	0.48	0.64	Sepsis
23	Kamalapathy PN et al (2021)	0.67	0.34	1.31	Stroke/CVA
24	Kamalapathy PN et al (2021)	0.5	0.44	0.56	Pulmonary complications
25	Kamalapathy PN et al (2021)	0.6	0.54	0.66	Readmission
26	Lee R et al (2020)	0.53	0.42	0.66	Any complication
27	Lee R et al (2020)	0.99	0.49	2.03	Sepsis
28	Lee R et al (2020)	0.33	0.14	0.77	Wound infection/dehiscence
29	Lee R et al (2020)	0.43	0.19	0.94	UTI
30	Lee R et al (2020)	0.79	0.53	1.19	Pulmonary complications
31	Lee R et al (2020)	2.98	0.6	14.8	Renal complications
32	Lee R et al (2020)	0.07	0.01	0.52	Need for BT
33	Lee R et al (2020)	0.55	0.28	1.08	Reintubation
34	Lee R et al (2020)	0.3	0.04	2.33	Stroke/CVA
35	Lee R et al (2020)	0.8	0.35	1.85	Cardiac complications
36	Lee R et al (2020)	0.44	0.16	1.26	DVT
37	Lee R et al (2020)	0.78	0.6	1.02	Readmission
38	Lee R et al (2020)	0.52	0.35	0.77	Unplanned reoperation
39	Lee R et al (2020)	0.16	0.02	1.17	Mortality
40	Vaishnav A et al_1 (2019)	0.14	0.05	0.46	Any complication
41	Vaishnav A et al_1 (2019)	0.16	0.01	3.29	Dysphagia
42	Vaishnav A et al_1 (2019)	0.27	0.01	6.48	Haematoma
43	Vaishnav A et al_1 (2019)	0.27	0.01	6.48	Reintubation
44	Shenoy K et al (2019)	2.45	0.15	38.8	Readmission
45	Patel DV et al (2019)	0.65	0.18	2.38	Dysphagia
46	Vaishnav A et al _2 (2019)	0.39	0.09	1.6	Any complication
47	Vaishnav A et al _2 (2019)	0.76	0.03	17.9	Haematoma
48	Vaishnav A et al _2 (2019)	0.76	0.03	17.9	Reintubation
49	Khalid SI et al (2019)	0.28	0.18	0.44	Any complication
50	Khalid SI et al (2019)	0.33	0.05	2.39	Wound infection/dehiscence
51	Khalid SI et al (2019)	0.09	0.01	0.62	UTI
52	Khalid SI et al (2019)	0.63	0.08	4.59	Pulmonary complications
53	Khalid SI et al (2019)	1.48	0.19	11.4	Cardiac complications
54	Khalid SI et al (2019)	0.44	0.06	3.19	DVT
55	Khalid SI et al (2019)	0.28	0.18	0.44	Readmission
56	Purger DA et al (2019)	0.5	0.18	1.38	Readmission
57	Purger DA et al (2019)	0.37	0.02	6.57	Unplanned reoperation
58	Purger DA et al (2019)	0.23	0.01	3.91	Dysphagia
59	Khanna R et al (2018)	0.35	0.22	0.54	Any complication
60	Khanna R et al (2018)	0.66	0.29	1.49	Wound infection/dehiscence
61	Khanna R et al (2018)	0.38	0.13	1.06	Pulmonary complications
62	Khanna R et al (2018)	0.38	0.13	1.06	Reintubation
63	Khanna R et al (2018)	0.58	0.13	2.65	DVT
64	Khanna R et al (2018)	0.22	0.05	0.94	UTI
65	Khanna R et al (2018)	0.73	0.24	2.17	Cardiac complications
66	Khanna R et al (2018)	0.14	0.02	1.03	Sepsis
67	Khanna R et al (2018)	0.6	0.41	0.89	Readmission
68	Khanna R et al (2018)	0.36	0.16	0.78	Unplanned reoperation
69	Khanna R et al (2018)	0.58	0.13	2.65	Mortality
70	Mullins J et al (2018)	1.28	0.7	2.35	Any complication
71	Arshi A et al (2018)	1.25	1.06	1.49	Renal complications
72	Arshi A et al (2018)	1.01	0.84	1.22	Pulmonary complications
73	Arshi A et al (2018)	0.94	0.76	1.18	Stroke/CVA
74	Arshi A et al (2018)	1.39	0.72	2.69	DVT
75	Arshi A et al (2018)	1.5	0.77	2.93	Cardiac complications
76	Purger DA et al (2018)	0.43	0.33	0.57	Readmission
77	Purger DA et al (2018)	0.38	0.15	0.91	Unplanned reoperation
78	Purger DA et al (2018)	0.37	0.02	6.04	Mortality
79	Purger DA et al (2018)	0.89	0.42	1.9	Dysphagia
80	Fu MC et al (2017)	0.29	0.22	0.38	Any complication
81	Fu MC et al (2017)	0.59	0.32	1.08	Sepsis
82	Fu MC et al (2017)	0.66	0.4	1.08	Wound infection/dehiscence
83	Fu MC et al (2017)	0.2	0.09	0.45	UTI
84	Fu MC et al (2017)	0.18	0.1	0.32	Pulmonary complications
85	Fu MC et al (2017)	0.12	0.05	0.33	Need for BT
86	Fu MC et al (2017)	0.26	0.04	1.94	Stroke/CVA
87	Fu MC et al (2017)	0.22	0.07	0.72	Cardiac complications
88	Fu MC et al (2017)	0.43	0.21	0.89	DVT
89	Fu MC et al (2017)	0.22	0.13	0.37	Unplanned reoperation
90	Fu MC et al (2017)	0.09	0.01	0.62	Mortality
91	McClelland S et al (2017)	0.02	0.002	0.1	Haematoma
92	McClelland S et al (2017)	0.01	0.001	0.15	Pulmonary complications
93	Adamson T et al (2016)	1.07	0.37	3.07	Readmission
94	Adamson T et al (2016)	0.49	0.07	3.45	Unplanned reoperation
95	Adamson T et al (2016)	0.97	0.18	5.3	Haematoma
96	Adamson T et al (2016)	3.41	0.78	14.9	Dysphagia
97	Adamson T et al (2016)	2.44	0.12	50.7	Wound infection/dehiscence
98	Adamson T et al (2016)	1.46	0.06	35.8	Mortality
99	McGirt MJ et al (2015)	0.42	0.19	0.92	Any complication
100	McGirt MJ et al (2015)	0.2	0.04	0.94	Unplanned reoperation
101	Martin CT et al (2014)	0.37	0.18	0.77	Any complication
102	Martin CT et al (2014)	0.35	0.02	6.36	Sepsis
103	Martin CT et al (2014)	0.49	0.11	2.1	Wound infection/dehiscence
104	Martin CT et al (2014)	0.56	0.13	2.43	UTI
105	Martin CT et al (2014)	0.13	0.01	2.09	Pulmonary complications
106	Martin CT et al (2014)	0.78	0.04	16.1	Renal complications
107	Martin CT et al (2014)	0.2	0.01	3.5	Need for BT
108	Martin CT et al (2014)	0.16	0.01	2.62	Reintubation
109	Martin CT et al (2014)	0.35	0.02	6.4	Stroke/CVA
110	Martin CT et al (2014)	1.94	0.18	21.4	Cardiac complications
111	Martin CT et al (2014)	0.29	0.01	4.52	DVT
112	Martin CT et al (2014)	0.12	0.02	0.86	Unplanned reoperation
113	Martin CT et al (2014)	0.77	0.09	6.63	Mortality
114	Liu JT et al (2009)	0.16	0.01	2.85	Any complication
115	Liu JT et al (2009)	0.16	0.01	2.85	Dysphagia
116	Liu JT et al (2009)	0.16	0.01	2.85	Haematoma
117	Steiber JR et al (2005)	0.86	0.24	3.08	Any complication
118	Steiber JR et al (2005)	2	0.43	9.32	Dysphagia
119	Steiber JR et al (2005)	0.22	0.01	3.93	Readmission
